# Supplementary material for: Systematic analysis of authorship demographics in global surgery
Source: PubMed Central journal article supplement — BMJ Glob Health. 2021 Oct 19;6(10):e006672. doi: 10.1136/bmjgh-2021-006672 (PMC8527109; doi:10.1136/bmjgh-2021-006672), 2021-10-19

**Table S1: Missing data.**

| <b>Author institutional affiliation</b>        | <b>Gender missing: number of authors (% of authors)</b> | <b>Seniority missing: number of authors (% of authors)</b> |
|------------------------------------------------|---------------------------------------------------------|------------------------------------------------------------|
| Affiliated with HIC institutions only          | 11 (0.2)                                                | 126 (2.7)                                                  |
| Affiliated with both HIC and LMIC institutions | 0 (0)                                                   | 10 (2.7)                                                   |
| Affiliated with LMIC institutions only         | 26 (0.6)                                                | 449 (10.7)                                                 |

**Table S2: Author characteristics by study topic.** Cells show the number of authors in each category (percentage of authors in brackets). Institutional affiliation **HIC** refers to authors affiliated only with HICs, **HIC and LMIC** refers to authors affiliated with both HICs and LMICs, **LMIC** refers to authors affiliated only with LMICs. The  $\chi^2$  test was used to compare distributions of author characteristics across study topics – corresponding p values are shown. (*O&G: Obstetrics and Gynaecology, A&C: Anaesthesia and Critical Care, HIC, high-income country; LMIC: low-income and middle-income country.*)

|                                  |                | <b>A&amp;C</b> | <b>Multiple topics</b> | <b>O&amp;G</b> | <b>Surgery</b> | <b>Significance</b> |
|----------------------------------|----------------|----------------|------------------------|----------------|----------------|---------------------|
| <b>Gender</b>                    | Male           | 279 (65)       | 236 (65)               | 1894 (50)      | 3217 (69)      | p < 0.001           |
|                                  | Female         | 152 (35)       | 128 (35)               | 1907 (50)      | 1451 (31)      |                     |
| <b>Institutional affiliation</b> | HIC            | 182 (42)       | 196 (54)               | 2006 (53)      | 2360 (50)      | p = 0.002           |
|                                  | HIC and LMIC   | 25 (6)         | 16 (4)                 | 141 (4)        | 183 (4)        |                     |
|                                  | LMIC           | 224 (52)       | 154 (42)               | 1671 (44)      | 2143 (46)      |                     |
| <b>Seniority</b>                 | 1, 2 (lowest)  | 34 (9)         | 42 (12)                | 403 (11)       | 416 (9)        | p < 0.001           |
|                                  | 3              | 59 (16)        | 105 (30)               | 696 (20)       | 841 (19)       |                     |
|                                  | 4, 5 (highest) | 287 (76)       | 200 (58)               | 2458 (69)      | 3175 (72)      |                     |

**Table S3: Gender and seniority of authors affiliated with at least 1 HIC (HIC authors) and authors affiliated only with LMICs (LMIC authors).** Cells show the number of authors (percentage of authors in brackets). The  $\chi^2$  test was used to compare distributions of author characteristics across institutional affiliation categories – corresponding p values are shown. (*HIC, high-income country; LMIC: low-income and middle-income country.*)

|                       |                         |            | <b>HIC authors</b> | <b>LMIC authors</b> | <b>Significance</b> |
|-----------------------|-------------------------|------------|--------------------|---------------------|---------------------|
| <b>First authors</b>  | <b>Author gender</b>    | Male       | 364 (44)           | 278 (67)            | p < 0.001           |
|                       |                         | Female     | 457 (56)           | 139 (33)            |                     |
|                       | <b>Author seniority</b> | 1 (lowest) | 18 (2)             | 2 (0.5)             | p < 0.001           |
|                       |                         | 2          | 106 (13)           | 33 (9)              |                     |
|                       |                         | 3          | 251 (31)           | 62 (16)             |                     |
|                       |                         | 4          | 307 (38)           | 212 (55)            |                     |
| 5 (highest)           |                         | 122 (15)   | 79 (20)            |                     |                     |
| <b>Last authors</b>   | <b>Author gender</b>    | Male       | 556 (64)           | 259 (73)            | p = 0.002           |
|                       |                         | Female     | 318 (37)           | 97 (27)             |                     |
|                       | <b>Author seniority</b> | 1 (lowest) | 0 (0)              | 1 (0.3)             | p = 0.032           |
|                       |                         | 2          | 18 (2)             | 17 (5)              |                     |
|                       |                         | 3          | 97 (11)            | 38 (11)             |                     |
|                       |                         | 4          | 390 (45)           | 146 (44)            |                     |
| 5 (highest)           |                         | 364 (42)   | 132 (40)           |                     |                     |
| <b>Middle authors</b> | <b>Author gender</b>    | Male       | 1887 (55)          | 2282 (67)           | p < 0.001           |
|                       |                         | Female     | 1516 (45)          | 1111 (33)           |                     |
|                       | <b>Author seniority</b> | 1 (lowest) | 51 (2)             | 17 (1)              | p < 0.001           |
|                       |                         | 2          | 293 (9)            | 339 (11)            |                     |
|                       |                         | 3          | 739 (22)           | 514 (17)            |                     |
|                       |                         | 4          | 1413 (43)          | 1394 (46)           |                     |
| 5 (highest)           |                         | 804 (24)   | 757 (25)           |                     |                     |

**Table S4: Gender distribution within each seniority grade for authors affiliated with at least 1 HIC (HIC authors) and authors affiliated only with LMICs (LMIC authors).** Cells show the number of authors (percentage of authors in brackets). The  $\chi^2$  test was used to compare the combined author gender and seniority distribution across institutional affiliation categories – corresponding p values are shown. (*HIC*, high-income country; *LMIC*: low-income and middle-income country.)

|                |                         |        | HIC authors | LMIC authors | Significance |
|----------------|-------------------------|--------|-------------|--------------|--------------|
| First authors  | Seniority 1, 2 (lowest) | Male   | 59 (7)      | 22 (6)       | p < 0.001    |
|                |                         | Female | 65 (8)      | 13 (3)       |              |
|                | Seniority 3             | Male   | 94 (12)     | 30 (8)       |              |
|                |                         | Female | 157 (20)    | 32 (8)       |              |
|                | Seniority 4             | Male   | 148 (18)    | 148 (38)     |              |
|                |                         | Female | 159 (20)    | 64 (16)      |              |
|                | Seniority 5 (highest)   | Male   | 57 (7)      | 56 (14)      |              |
|                |                         | Female | 65 (8)      | 23 (6)       |              |
| Last authors   | Seniority 1, 2 (lowest) | Male   | 3 (0.3)     | 9 (3)        | p = 0.001    |
|                |                         | Female | 15 (2)      | 9 (3)        |              |
|                | Seniority 3             | Male   | 52 (6)      | 24 (7)       |              |
|                |                         | Female | 45 (5)      | 14 (4)       |              |
|                | Seniority 4             | Male   | 239 (28)    | 108 (32)     |              |
|                |                         | Female | 151 (17)    | 38 (11)      |              |
|                | Seniority 5 (highest)   | Male   | 257 (30)    | 100 (30)     |              |
|                |                         | Female | 107 (12)    | 32 (10)      |              |
| Middle authors | Seniority 1, 2 (lowest) | Male   | 111 (3)     | 202 (15)     | p < 0.001    |
|                |                         | Female | 232 (7)     | 154 (10)     |              |
|                | Seniority 3             | Male   | 377 (11)    | 329 (9)      |              |
|                |                         | Female | 362 (11)    | 185 (5)      |              |
|                | Seniority 4             | Male   | 838 (25)    | 988 (28)     |              |
|                |                         | Female | 575 (17)    | 403 (11)     |              |
|                | Seniority 5 (highest)   | Male   | 519 (16)    | 559 (16)     |              |
|                |                         | Female | 285 (9)     | 197 (6)      |              |

**Table S5: Characteristics of studies with different authorship networks.** Characteristics of studies where all authors were affiliated only with HICs (**all HIC authors**), studies where all authors were affiliated only with LMICs (**all LMIC authors**), studies with HIC first and last authors and studies with LMIC first and last authors are shown. Some studies are included in multiple categories, e.g. some studies are included both in the “**all HIC authors**” and “**HIC first and last authors**” categories. Cells in the first row show the number of studies (percentage of total studies in brackets). (*HIC, high-income country; LMIC: low-income and middle-income country.*)

|                                | <b>All HIC authors</b> | <b>All LMIC authors</b> | <b>HIC first and last authors</b> | <b>LMIC first and last authors</b> |
|--------------------------------|------------------------|-------------------------|-----------------------------------|------------------------------------|
| Number of studies (% of total) | 220 (18)               | 200 (16)                | 726 (59)                          | 259 (21)                           |
| H5 index (median)              | 49                     | 40                      | 51                                | 43                                 |
| % LMIC authors (median)        | 0                      | 100                     | 22.6                              | 100                                |

**Table S6: Gender distribution within each seniority grade for authors affiliated with at least 1 HIC (HIC authors) and authors affiliated only with LMICs (LMIC authors), separated by study type.** Subgroup analyses for all 3 authorship positions (first, last and middle authors) were performed separately for HIC and LMIC authors. The  $\chi^2$  test was used to compare the combined author gender and seniority distribution across studies where all authors were affiliated only with HICs (**all HIC authors**), studies where all authors were affiliated only with LMICs (**all LMIC authors**), studies with HIC first and last authors and studies with LMIC first and last authors. Cells show the number of authors (percentage of authors in brackets). (*HIC, high-income country; LMIC: low-income and middle-income country.*)

|                       |                        |                        | All studies | All HIC authors | All LMIC authors | HIC first and last authors | LMIC first and last authors | Significance |           |           |
|-----------------------|------------------------|------------------------|-------------|-----------------|------------------|----------------------------|-----------------------------|--------------|-----------|-----------|
| HIC first authors     | Seniority 1/2 (lowest) | Male                   | 59 (7)      | 16 (8)          |                  | 54 (8)                     |                             | p = 0.325    |           |           |
|                       |                        | Female                 | 65 (8)      | 17 (8)          |                  | 61 (9)                     |                             |              |           |           |
|                       | Seniority 3            | Male                   | 94 (12)     | 33 (16)         |                  | 85 (12)                    |                             |              |           |           |
|                       |                        | Female                 | 157 (20)    | 52 (25)         |                  | 139 (20)                   |                             |              |           |           |
|                       | Seniority 4            | Male                   | 148 (18)    | 47 (22)         |                  | 133 (19)                   |                             |              |           |           |
|                       |                        | Female                 | 159 (20)    | 25 (12)         |                  | 136 (19)                   |                             |              |           |           |
|                       | Seniority 5 (highest)  | Male                   | 57 (7)      | 9 (4)           |                  | 52 (7)                     |                             |              |           |           |
|                       |                        | Female                 | 65 (8)      | 13 (6)          |                  | 47 (7)                     |                             |              |           |           |
|                       | LMIC first authors     | Seniority 1/2 (lowest) | Male        | 22 (6)          |                  | 12 (7)                     |                             |              | 18 (8)    | p = 0.996 |
|                       |                        |                        | Female      | 13 (3)          |                  | 6 (3)                      |                             |              | 8 (3)     |           |
| Seniority 3           |                        | Male                   | 32 (8)      |                 | 15 (8)           |                            | 21 (9)                      |              |           |           |
|                       |                        | Female                 | 30 (8)      |                 | 18 (10)          |                            | 23 (10)                     |              |           |           |
| Seniority 4           |                        | Male                   | 148 (38)    |                 | 72 (40)          |                            | 87 (37)                     |              |           |           |
|                       |                        | Female                 | 64 (16)     |                 | 27 (15)          |                            | 41 (17)                     |              |           |           |
| Seniority 5 (highest) |                        | Male                   | 56 (14)     |                 | 20 (11)          |                            | 28 (12)                     |              |           |           |
|                       |                        | Female                 | 23 (6)      |                 | 11 (6)           |                            | 12 (5)                      |              |           |           |
| HIC last authors      |                        | Seniority 1/2 (lowest) | Male        | 3 (0.3)         | 0 (0)            |                            | 1 (0.1)                     |              | p = 0.796 |           |
|                       |                        |                        | Female      | 15 (2)          | 5 (2)            |                            | 12 (2)                      |              |           |           |
|                       | Seniority 3            | Male                   | 52 (6)      | 11 (5)          |                  | 41 (6)                     |                             |              |           |           |

|                     |                        |        |          |          |         |          |         |                                                                                                                                           |
|---------------------|------------------------|--------|----------|----------|---------|----------|---------|-------------------------------------------------------------------------------------------------------------------------------------------|
|                     |                        | Female | 45 (5)   | 18 (8)   |         | 41 (6)   |         |                                                                                                                                           |
|                     | Seniority 4            | Male   | 239 (28) | 63 (29)  |         | 196 (27) |         |                                                                                                                                           |
|                     |                        | Female | 151 (17) | 37 (17)  |         | 127 (18) |         |                                                                                                                                           |
|                     | Seniority 5 (highest)  | Male   | 257 (30) | 48 (22)  |         | 209 (29) |         |                                                                                                                                           |
|                     |                        | Female | 107 (12) | 32 (15)  |         | 91 (13)  |         |                                                                                                                                           |
| LMIC last authors   | Seniority 1/2 (lowest) | Male   | 9 (3)    |          | 2 (1)   |          | 3 (1)   | p = 0.850                                                                                                                                 |
|                     |                        | Female | 9 (3)    |          | 8 (4)   |          | 8 (3)   |                                                                                                                                           |
|                     | Seniority 3            | Male   | 24 (7)   |          | 15 (8)  |          | 20 (8)  |                                                                                                                                           |
|                     |                        | Female | 14 (4)   |          | 9 (5)   |          | 11 (5)  |                                                                                                                                           |
|                     | Seniority 4            | Male   | 108 (32) |          | 67 (37) |          | 88 (37) |                                                                                                                                           |
|                     |                        | Female | 38 (11)  |          | 24 (13) |          | 29 (12) |                                                                                                                                           |
|                     | Seniority 5 (highest)  | Male   | 100 (30) |          | 41 (23) |          | 60 (25) |                                                                                                                                           |
|                     |                        | Female | 32 (10)  |          | 13 (7)  |          | 21 (9)  |                                                                                                                                           |
| HIC middle authors  | Seniority 1/2 (lowest) | Male   | 111 (3)  | 40 (5)   |         | 18 (45)  | 0       | Comparing all 4 study types:<br><br>p < 0.001<br><br>Comparing All studies vs Studies with only HIC or HIC/LMIC authors:<br><br>p < 0.001 |
|                     |                        | Female | 232 (7)  | 60 (8)   |         | 22 (55)  | 1 (100) |                                                                                                                                           |
|                     | Seniority 3            | Male   | 377 (11) | 123 (16) |         | 0        | 0       |                                                                                                                                           |
|                     |                        | Female | 362 (11) | 100 (13) |         | 0        | 0       |                                                                                                                                           |
|                     | Seniority 4            | Male   | 838 (25) | 193 (25) |         | 0        | 0       |                                                                                                                                           |
|                     |                        | Female | 575 (17) | 102 (13) |         | 0        | 0       |                                                                                                                                           |
|                     | Seniority 5 (highest)  | Male   | 519 (16) | 93 (12)  |         | 0        | 0       |                                                                                                                                           |
|                     |                        | Female | 285 (9)  | 48 (6)   |         | 0        | 0       |                                                                                                                                           |
| LMIC middle authors | Seniority 1/2 (lowest) | Male   | 202 (7)  |          | 38 (6)  | 6 (86)   | 6 (67)  | Comparing all 4 study types:<br><br>p < 0.001                                                                                             |
|                     |                        | Female | 154 (5)  |          | 38 (6)  | 1 (14)   | 3 (33)  |                                                                                                                                           |
|                     | Seniority 3            | Male   | 329 (11) |          | 61 (10) | 0        | 0       |                                                                                                                                           |
|                     |                        | Female | 185 (6)  |          | 40 (6)  | 0        | 0       |                                                                                                                                           |

|  |                       |        |          |  |          |   |   |                                                                                  |
|--|-----------------------|--------|----------|--|----------|---|---|----------------------------------------------------------------------------------|
|  | Seniority 4           | Male   | 988 (33) |  | 226 (36) | 0 | 0 | <i>Comparing All studies vs Studies with only LMIC authors:</i><br><br>p < 0.001 |
|  |                       | Female | 403 (13) |  | 124 (20) | 0 | 0 |                                                                                  |
|  | Seniority 5 (highest) | Male   | 559 (19) |  | 74 (12)  | 0 | 0 |                                                                                  |
|  |                       | Female | 197 (7)  |  | 32 (5)   | 0 | 0 |                                                                                  |

**Figure S1: PRISMA flowchart depicting the article screening process.**

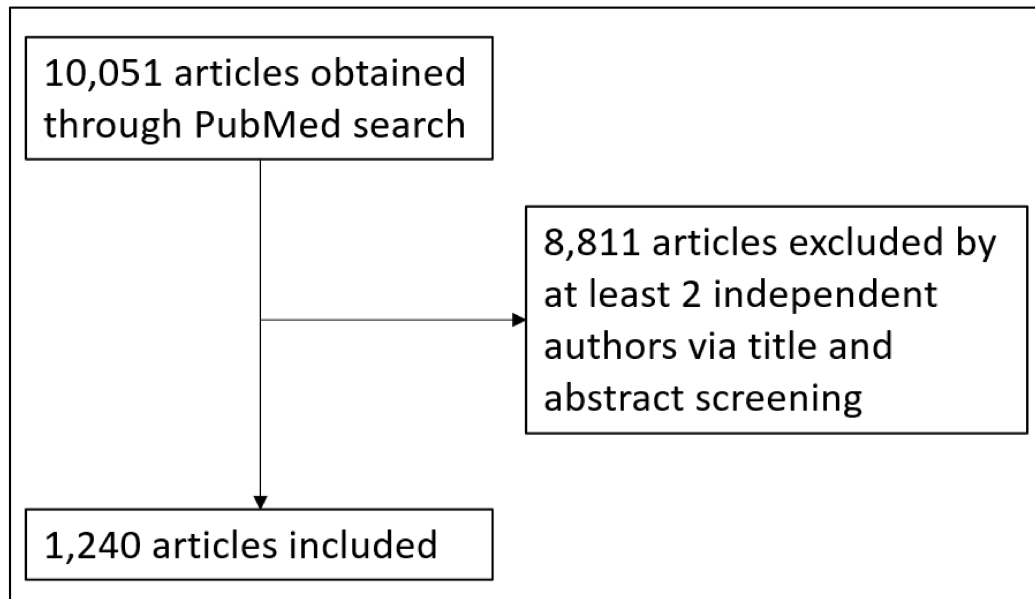

Supplement: bmjgh-2021-006672supp002.pdf [file bmjgh-2021-006672supp002.pdf]
