# Supplementary figures and images for: Systematic analysis of authorship demographics in global surgery
Source: PubMed Central journal article supplement — BMJ Glob Health. 2021 Oct 19;6(10):e006672. doi: 10.1136/bmjgh-2021-006672 (PMC8527109; doi:10.1136/bmjgh-2021-006672), 2021-10-19

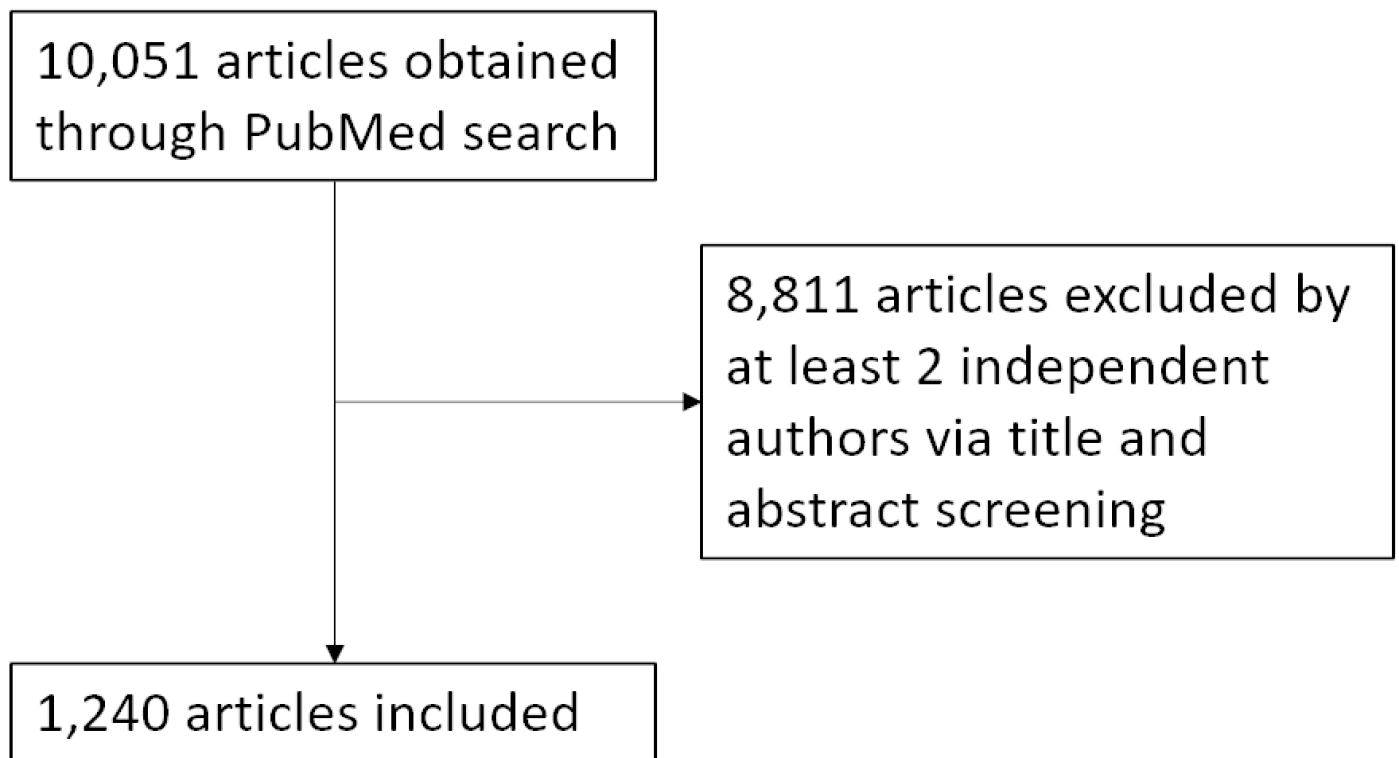

Supplement: bmjgh-2021-006672supp001.pdf [file bmjgh-2021-006672supp001.pdf]
